# Supplementary material
Source: PubMed Central journal article supplement (PMC5365675)
Supplement: AAC.02288-16_zac004176079s1.pdf [file AAC.02288-16_zac004176079s1.pdf]

1 **SUPPLEMENTARY MATERIAL**

2 **Bacteriocins as a source for anti-leishmanial compounds. The enterocin AS-48 as a**  
3 **proof-of-mechanism.**

4 **Authors:** María Ángeles Abengózar<sup>1</sup>; Rubén Cebrián<sup>2</sup>; José María Saugar<sup>1,3</sup>; Teresa  
5 Gárate<sup>3</sup>; Eva Valdivia<sup>2</sup>; Manuel Martínez-Bueno<sup>2</sup>; Mercedes Maqueda<sup>2</sup>, and Luis Rivas<sup>1\*</sup>

6 <sup>1</sup>Centro de Investigaciones Biológicas (CSIC), Physico-Chemical Biology Department  
7 Unidad Asociada Interacciones, Metabolismo y Bioanálisis CSIC-CEU, Ramiro de Maeztu  
8 9, 28040, Madrid, Spain.

9 <sup>2</sup>Departamento de Microbiología, Facultad de Ciencias, Universidad de Granada, Granada,  
10 Spain.

11 <sup>3</sup>Helminth Unit, Parasitology Department, Centro Nacional de Microbiología, Instituto de  
12 Salud Carlos III, Crtra. Majadahonda-Pozuelo, km 2.2, 28220, Majadahonda, Madrid,  
13 Spain.

14 **Content:**

15 **Supplemental Figure 1.-** Uptake of fluoresceinated AS-48 by *L. donovani* promastigotes  
16 at different temperatures.

17 **Supplemental Figure 2.-** Induction of subG<sub>1</sub> in *L. donovani* promastigotes by AS-48.

18 **Supplemental figure 3.-** Location of Fl-AS-48 in *L. pifanoi* infected macrophages Raw  
19 264.7.

20

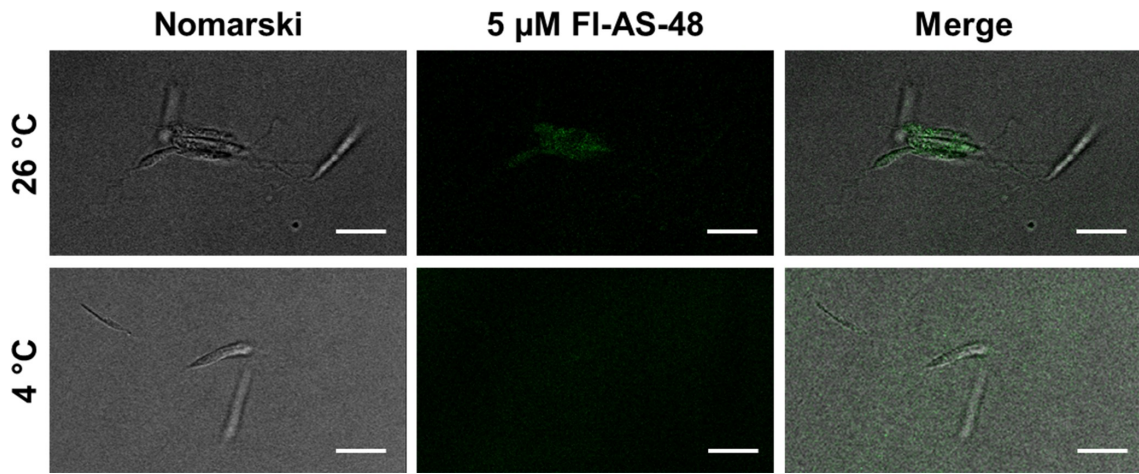

21

22 **Supplemental Figure 1.- Uptake of fluoresceinated AS-48 by *L. donovani***  
 23 **promastigotes at different temperatures.** Parasites were incubated under the standard  
 24 conditions of assay with AS-48 either at 26  $^{\circ}$ C or at 4  $^{\circ}$ C for 4 h and observed unfixed  
 25 under confocal microscopy. Fluorescence settings:  $\lambda_{\text{EXC}}= 488 \text{ nm}$ ,  $\lambda_{\text{EM}}= 519 \text{ nm}$ .

26

27

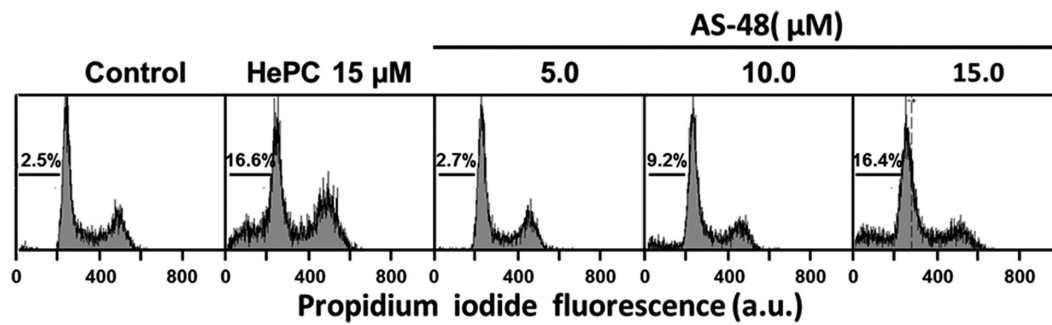

28

29 **Supplemental Figure 2.- Induction of subG<sub>1</sub> in *L. donovani* promastigotes by AS-48.**

30 Parasites were incubated under standard conditions ( $2 \times 10^7$  cells/ml, 4 h) with different

31 concentrations of AS-48. Afterwards, cells were processed as described in Materials and

32 Methods, and cell cycle was analysed by cytofluorometry after PI staining ( $\lambda_{\text{EXC}} = 488$  nm,

33  $\lambda_{\text{EM}} = 620$  nm). Miltefosine (HePC) at 15 μM was used as positive control for apoptosis.

34 Percentage of subG<sub>1</sub> population was indicated inside each histogram. Experiment is

35 representative of other two carried out independently.

36

37

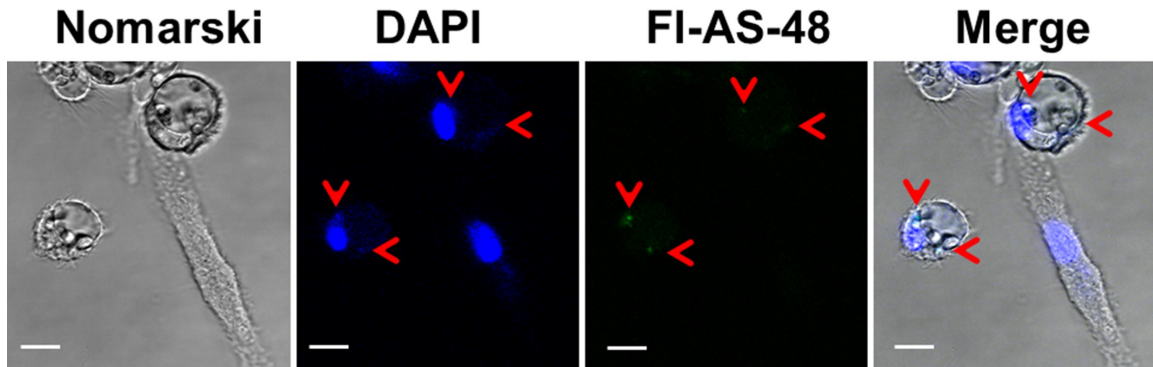

38

39 **Supplemental figure 3.- Location of FI-AS-48 in *L. pifanoi* infected macrophages Raw**  
40 **264.7.** Macrophages were infected with *L. pifanoi* amastigotes as described in Materials  
41 and Methods. Once infection was established, 5  $\mu$ M AS-48 was added and incubated for 14  
42 h. Arrows point out to representative intracellular amastigotes. Fluorescence settings: FI-  
43 AS-48,  $\lambda_{\text{EXC}}= 488$  nm,  $\lambda_{\text{EM}}= 519$  nm; DAPI,  $\lambda_{\text{EXC}}= 358$  nm,  $\lambda_{\text{EM}}= 461$  nm. Magnification  
44 bar = 10  $\mu$ m.

45

46

47

48

49

50

51

52
